# Supplementary material for: Systematic Analysis of the DNA Damage Response Network in Telomere Defective Budding Yeast
Source: PubMed Central journal article supplement (PMC5499144; doi:10.1534/g3.117.042283), 2017-05-25

# Supplementary Figure 1

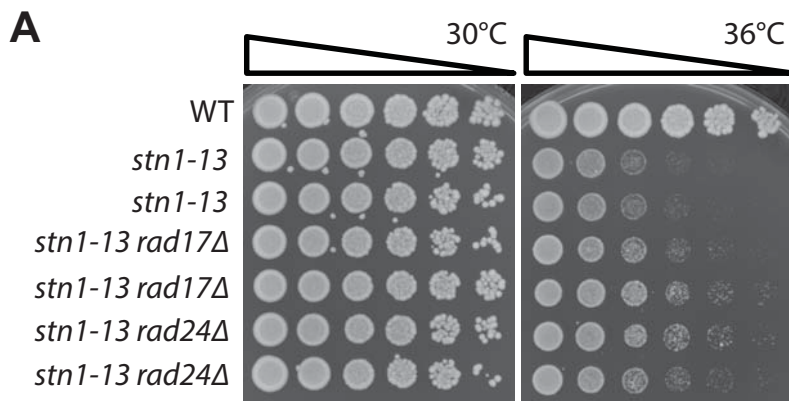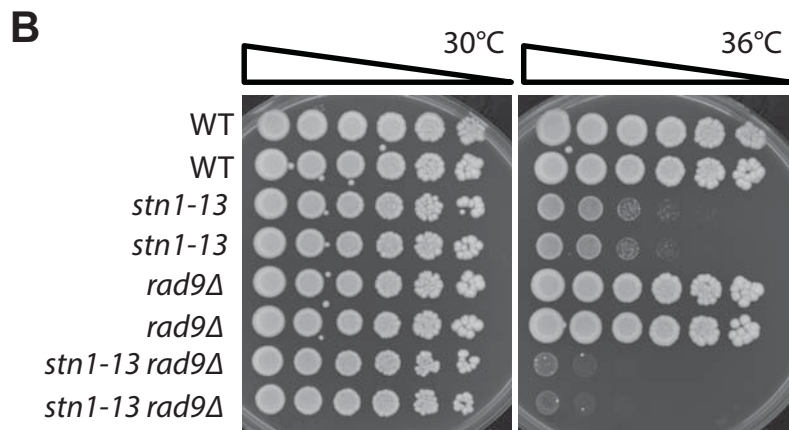

# Supplementary Figure 2

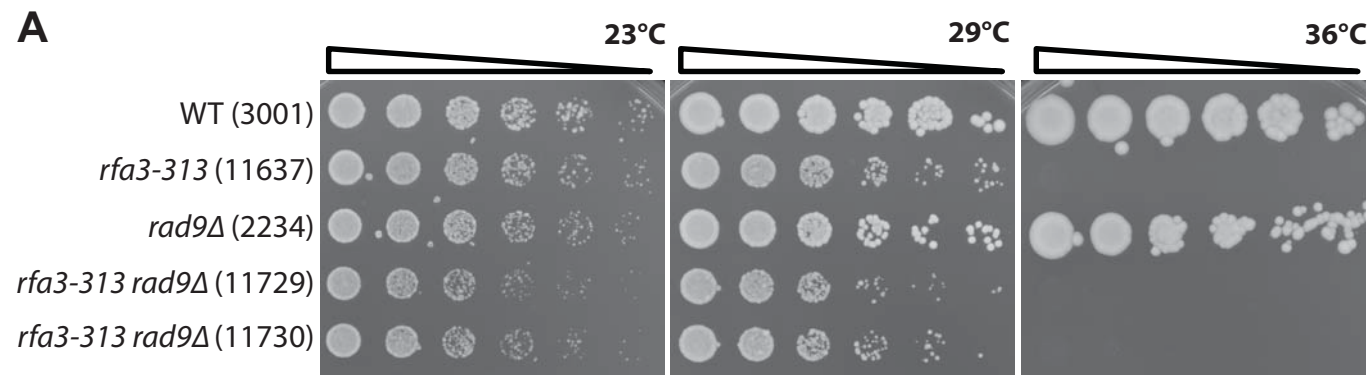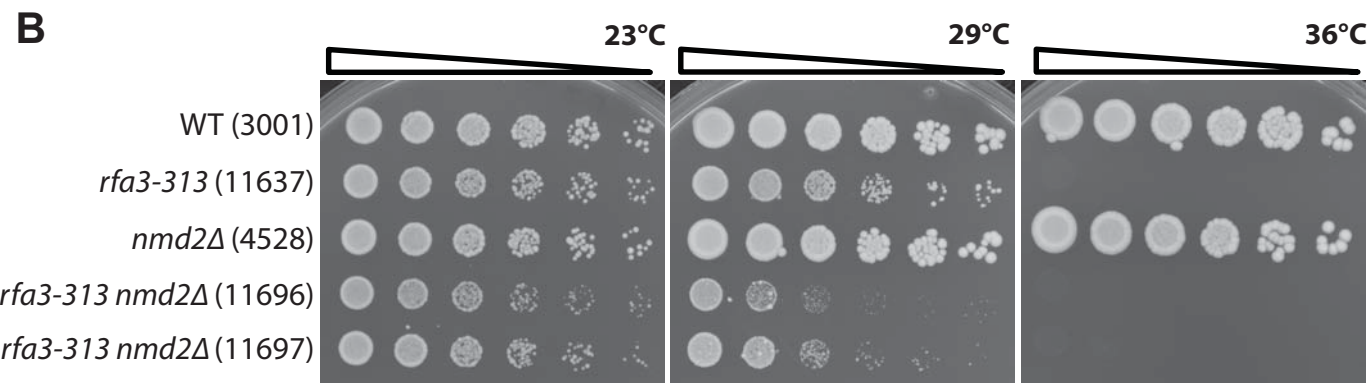

# Supplementary Figure 3

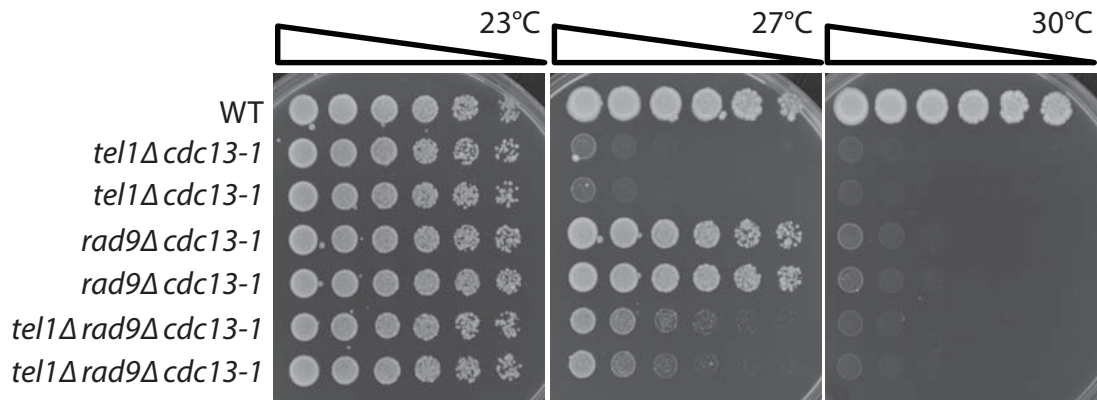

# Supplementary Figure 4

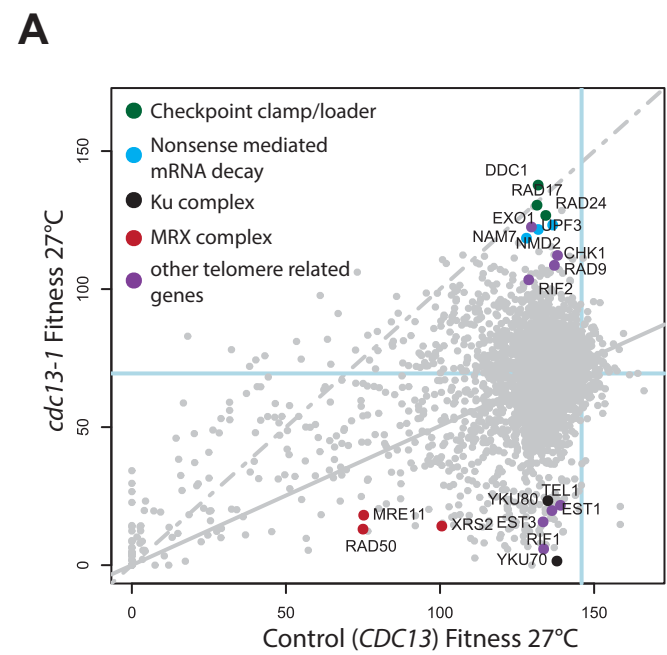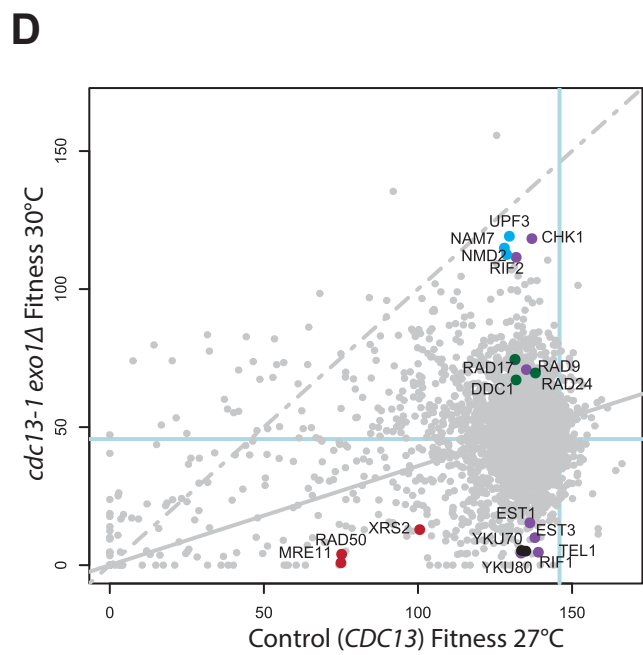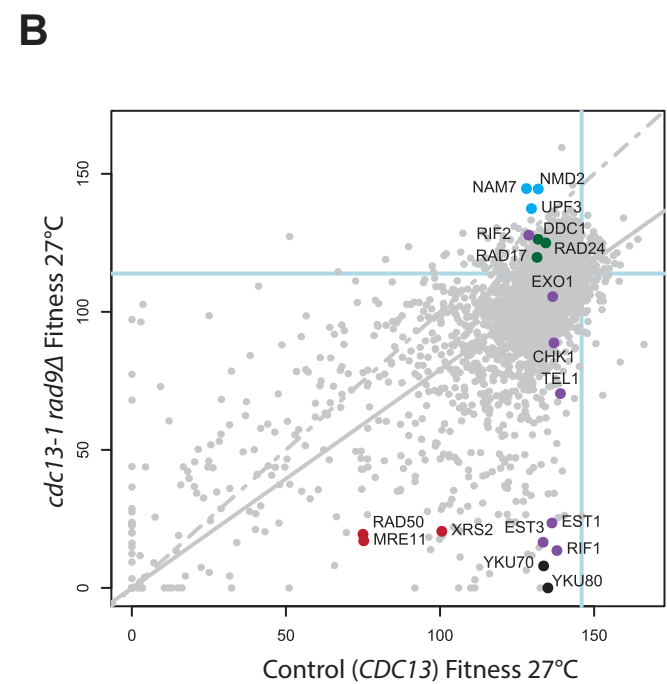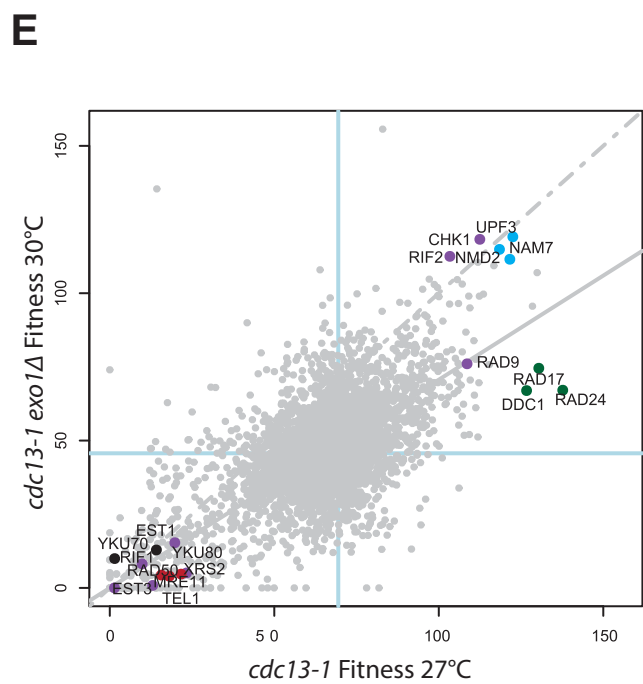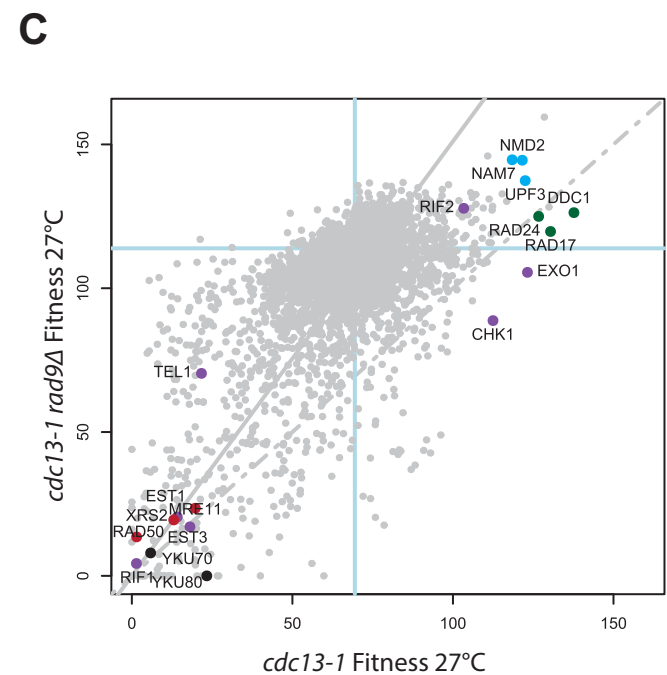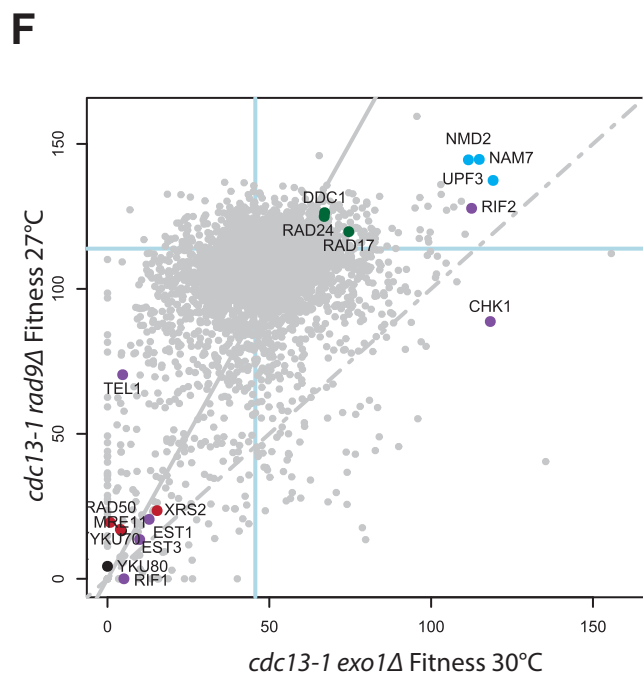

Supplement: 2375FileS1.pdf [file 2375FileS1.pdf]
