# Supplementary material for: Systematic Analysis of the DNA Damage Response Network in Telomere Defective Budding Yeast
Source: PubMed Central journal article supplement (PMC5499144; doi:10.1534/g3.117.042283), 2017-05-25
Supplement: 2375FileS2.pdf [file 2375FileS2.pdf]

**Table 1**

| <b>Strain</b> | <b>Genetic Background</b> | <b>Genotype</b>                                                                                           | <b>Related Figures</b> |
|---------------|---------------------------|-----------------------------------------------------------------------------------------------------------|------------------------|
| DLY640        | W303                      | MAT $\alpha$                                                                                              | 4, S1, S3              |
| DLY1195       | W303                      | MAT $\alpha$ cdc13-1                                                                                      | 4                      |
| DLY1255       | W303                      | MAT $\alpha$ rad9::HIS3 cdc13-1                                                                           | S2                     |
| DLY1256       | W303                      | MAT $\alpha$ rad9::HIS3 cdc13-1                                                                           | S2                     |
| DLY1273       | W303                      | MAT $\alpha$ exo1::LEU2                                                                                   | 5                      |
| DLY1296       | W303                      | MAT $\alpha$ exo1::LEU2 cdc13-1                                                                           | 4                      |
| DLY1543       | W303                      | MAT $\alpha$ tel1::TRP1 cdc13-1                                                                           | S3                     |
| DLY1544       | W303                      | MAT $\alpha$ tel1::TRP1 cdc13-1                                                                           | S3                     |
| DLY1585       | W303                      | MAT $\alpha$ rad9::KANMX                                                                                  | S1                     |
| DLY2234       | W303                      | MAT $\alpha$ rad9::LEU2                                                                                   | S1, S2                 |
| DLY2787       | W303                      | MAT $\alpha$ yku70::LEU2                                                                                  | 4                      |
| DLY2988       | W303                      | MAT $\alpha$ cdc13-1 rad53::HIS3 sml1::KANMX                                                              | 5                      |
| DLY3001       | W303                      | MAT $\alpha$                                                                                              | S1, S2                 |
| DLY4528       | W303                      | MAT $\alpha$ nmd2::HIS3                                                                                   | S1                     |
| DLY4557       | W303                      | MAT $\alpha$ cdc13-1 int                                                                                  | 5                      |
| DLY4625       | W303                      | MAT $\alpha$ cdc13-1 int nmd2::HIS3                                                                       | 4                      |
| DLY4647       | W303                      | MAT $\alpha$ cdc13-1 rad9::HIS3                                                                           | 5, S3                  |
| DLY4921       | W303                      | MAT $\alpha$ cdc13-1 int exo1::LEU2                                                                       | 5                      |
| DLY4922       | W303                      | MAT $\alpha$ cdc13-1 rad9::HIS3 exo1::LEU2                                                                | 5                      |
| DLY4931       | W303                      | MAT $\alpha$ cdc13-1 rad24::TRP1                                                                          | 5                      |
| DLY5007       | W303                      | MAT $\alpha$ yku70::LEU2 nmd2::HIS3                                                                       | 4                      |
| DLY5097       | W303                      | MAT $\alpha$ cdc13-1 exo1::LEU2 rad24::TRP1                                                               | 5                      |
| DLY5255       | W303                      | MAT $\alpha$ rad9::LEU2 nmd2::HIS3 cdc13-1 int                                                            | 4                      |
| DLY5260       | W303                      | MAT $\alpha$ cdc13-1 cdc15-2 bar1::hisG                                                                   | 6                      |
| DLY5261       | W303                      | MAT $\alpha$ cdc13-1 cdc15-2 bar1::hisG                                                                   | 6                      |
| DLY5266       | W303                      | MAT $\alpha$ cdc13-1 cdc15-2 bar1::hisG exo1::LEU2                                                        | 6                      |
| DLY5386       | S288C                     | MAT $\alpha$ LEU2::cdc13-1 int::HPHMX rad9::NATMX lyp1 $\Delta$<br>can1::MFA1pr-HIS3 ura3 leu2 his3 LYS2+ | 2, S4                  |
| DLY5688       | S288C                     | MAT $\alpha$ LEU2::cdc13-1 int::HPHMX lyp1 $\Delta$ can1::MFA1pr-HIS3 ura3<br>leu2 his3 LYS2+             | 1, 2, S4               |
| DLY6720       | S288C                     | MAT $\alpha$ LEU2::cdc13-1 int::HPHMX exo1::NATMX lyp1 $\Delta$<br>can1::STE2pr-his5 ura3 leu2 his3 LYS2+ | 2, S4                  |
| DLY7106       | W303                      | MAT $\alpha$ chk1::HIS3                                                                                   | 5                      |
| DLY7108       | W303                      | MAT $\alpha$ exo2::LEU2 chk1::HIS3                                                                        | 5                      |
| DLY7110       | W303                      | MAT $\alpha$ cdc13-1 chk1::HIS3                                                                           | 5                      |
| DLY7112       | W303                      | MAT $\alpha$ cdc13-1 exo1::LEU2 chk1::HIS3                                                                | 5                      |
| DLY7143       | W303                      | MAT $\alpha$ cdc13-1 cdc15-2 bar1::hisG chk1::HIS3                                                        | 6                      |
| DLY7145       | W303                      | MAT $\alpha$ cdc13-1 cdc15-2 bar1::hisG exo1::LEU2 chk1::HIS3                                             | 6                      |
| DLY7146       | W303                      | MAT $\alpha$ cdc13-1 cdc15-2 bar1::hisG exo1::LEU2 chk1::HIS3                                             | 6                      |
| DLY7747       | W303                      | MAT $\alpha$ exo1::LEU2 nmd2::URA3 cdc13-1                                                                | 4                      |
| DLY8460       | W303                      | MAT $\alpha$                                                                                              | 5                      |
| DLY8767       | S288C                     | MAT $\alpha$ LEU2::stn1-13::HPHMX lyp1::NATMX can1::STE2pr-his5<br>ura3 leu2 his3 met15 LYS2+             | 1                      |
| DLY9181       | S288C                     | MAT $\alpha$ LEU2::rfa3-313::HPHMX lyp1::NATMX can1::STE2pr-his5<br>ura3 leu2 his3 met15 LYS2+            | 1                      |

|          |       |                                                                                       |       |
|----------|-------|---------------------------------------------------------------------------------------|-------|
| DLY9326  | S288C | MAT $\alpha$ lyp1::HPHMX::LEU2::NATMX can1::STE2pr-his5 ura3 leu2<br>his3 met15 LYS2+ | 1     |
| DLY9866  | W303  | MAT $\alpha$ rad9::LEU2 cdc13-1                                                       | 4, S3 |
| DLY11098 | W303  | MAT $\alpha$ stn1-13                                                                  | S1    |
| DLY11099 | W303  | MAT $\alpha$ stn1-13                                                                  | S1    |
| DLY11100 | W303  | MAT $\alpha$ stn1-13 rad9::LEU2                                                       | S1    |
| DLY11101 | W303  | MAT $\alpha$ stn1-13 rad9::LEU2                                                       | S1    |
| DLY11102 | W303  | MAT $\alpha$ stn1-13 rad24::TRP1                                                      | S1    |
| DLY11103 | W303  | MAT $\alpha$ stn1-13 rad24::TRP1                                                      | S1    |
| DLY11104 | W303  | MAT $\alpha$ stn1-13 rad17::TRP1                                                      | S1    |
| DLY11105 | W303  | MAT $\alpha$ stn1-13 rad17::TRP1                                                      | S1    |
| DLY11215 | W303  | MAT $\alpha$ nmd2::URA3 stn1-13                                                       | 4     |
| DLY11216 | W303  | MAT $\alpha$ stn1-13                                                                  | 4     |
| DLY11637 | W303  | MAT $\alpha$ rfa3-313::KANMX                                                          | S2    |
| DLY11696 | W303  | MAT $\alpha$ rfa3-313::KANMX nmd2::HIS3                                               | S2    |
| DLY11697 | W303  | MAT $\alpha$ rfa3-313::KANMX nmd2::HIS3                                               | S2    |
| DLY11729 | W303  | MAT $\alpha$ rfa3-313::KANMX rad9::HIS3                                               | S2    |
| DLY11730 | W303  | MAT $\alpha$ rfa3-313::KANMX rad9::HIS3                                               | S2    |
| DLY11182 | W303  | MAT $\alpha$ rad9::HIS3 tel1::TRP1 cdc13-1                                            | S3    |
| DLY11183 | W303  | MAT $\alpha$ rad9::HIS3 tel1::TRP1 cdc13-1                                            | S3    |

Table 2

## Quantitative Fitness Analysis Screens

| Screen no. | Query Strain         | Spotting     | Media          | Temperature |
|------------|----------------------|--------------|----------------|-------------|
| QFA0141    | <i>ura3</i>          | dilute       | SDM_rhk_CTGN   | 27°C, UD_X3 |
| QFA0132    | <i>lyp1</i>          | concentrated | SDM_rhIk_CTGNH | 30°C, 33°C  |
| QFA0140    | <i>cdc13-1</i>       | dilute       | SDM_rhIk_CTGH  | 27°C, UD_X3 |
| QFA0142    | <i>rad9Δ cdc13-1</i> | dilute       | SDM_rhIk_CTGNH | 27°C, UD_X1 |
| QFA0051    | <i>exo1Δ cdc13-1</i> | dilute       | SDM_rhIk_CTGNH | 27°C, 30°C  |
| QFA0136    | <i>stn1-13</i>       | concentrated | SDM_rhIk_CTGNH | 33°C        |
| QFA0131    | <i>rfa3-313</i>      | concentrated | SDM_rhIk_CTGNH | 30°C        |

**Table 3**

List of genes highlighted in the QFA screens

| Standard Name | Comple                       | Description from Saccharomyces Genome Database                                                                                                                                                                                                                                                                                                          |
|---------------|------------------------------|---------------------------------------------------------------------------------------------------------------------------------------------------------------------------------------------------------------------------------------------------------------------------------------------------------------------------------------------------------|
| Ddc1          | 911 sliding clamp            | DNA damage checkpoint protein; part of a PCNA-like complex required for DNA damage response, required for pachytene checkpoint to inhibit cell cycle in response to unrepaired recombination intermediates; potential Cdc28p substrate; forms nuclear foci upon DNA replication stress                                                                  |
| Rad17         | 911 sliding clamp            | Checkpoint protein; involved in the activation of the DNA damage and meiotic pachytene checkpoints; with Mec3p and Ddc1p, forms a clamp that is loaded onto partial duplex DNA; homolog of human and <i>S. pombe</i> Rad1 and <i>U. maydis</i> Rec1 proteins                                                                                            |
| Rad24         | 911 sliding clamp            | Checkpoint protein; involved in the activation of the DNA damage and meiotic pachytene checkpoints; subunit of a clamp loader that loads Rad17p-Mec3p-Ddc1p onto DNA; homolog of human and <i>S. pombe</i> Rad17 protein                                                                                                                                |
| Mre11         | MRX complex                  | Nuclease subunit of the MRX complex with Rad50p and Xrs2p; complex functions in repair of DNA double-strand breaks and in telomere stability; Mre11p associates with Ser/Thr-rich ORFs in premeiotic phase; nuclease activity required for MRX function; widely conserved; forms nuclear foci upon DNA replication stress                               |
| Rad50         | MRX complex                  | Subunit of MRX complex with Mre11p and Xrs2p; complex is involved in processing double-strand DNA breaks in vegetative cells, initiation of meiotic DSBs, telomere maintenance, and nonhomologous end joining; forms nuclear foci upon DNA replication stress                                                                                           |
| Xrs2          | MRX complex                  | Protein required for DNA repair; component of the Mre11 complex, which is involved in double strand breaks, meiotic recombination, telomere maintenance, and checkpoint signaling                                                                                                                                                                       |
| Nam7          | Nonsense Mediated mRNA decay | ATP-dependent RNA helicase of the SFI superfamily; involved in nonsense mediated mRNA decay; required for efficient translation termination at nonsense codons and targeting of NMD substrates to P-bodies; binds to the small ribosomal subunit via an interaction with Rps26; forms cytoplasmic foci upon DNA replication stress                      |
| Nmd2          | Nonsense Mediated mRNA decay | Protein involved in the nonsense-mediated mRNA decay (NMD) pathway; interacts with Nam7p and Upf3p; involved in telomere maintenance                                                                                                                                                                                                                    |
| Upf3          | Nonsense Mediated mRNA decay | Component of the nonsense-mediated mRNA decay (NMD) pathway; along with Nam7p and Nmd2p; involved in decay of mRNA containing nonsense codons; involved in telomere maintenance                                                                                                                                                                         |
| Yku70         | Ku heterodimer               | Subunit of the telomeric Ku complex (Yku70p-Yku80p); involved in telomere length maintenance, structure and telomere position effect; required for localization of telomerase ribonucleoprotein to nucleus via interaction with the TLC1 guide RNA; relocates to sites of double-strand cleavage to promote nonhomologous end joining during DSB repair |

|       |                         |                                                                                                                                                                                                                                                                                                                                                                                                                                                                                      |
|-------|-------------------------|--------------------------------------------------------------------------------------------------------------------------------------------------------------------------------------------------------------------------------------------------------------------------------------------------------------------------------------------------------------------------------------------------------------------------------------------------------------------------------------|
| Yku80 | Ku heterodimer          | Subunit of the telomeric Ku complex (Yku70p-Yku80p); involved in telomere length maintenance, structure and telomere position effect; required for localization of telomerase ribonucleoprotein via interaction with the TLC1 guide RNA; relocates to sites of double-strand cleavage to promote nonhomologous end joining during DSB repair                                                                                                                                         |
| Est1  | Telomerase              | TLC1 RNA-associated factor involved in telomere length regulation; recruitment subunit of telomerase; has G-quadruplex promoting activity required for telomere elongation; possible role in activating telomere-bound Est2p-TLC1-RNA; EST1 has a paralog, EBS1, that arose from the whole genome duplication                                                                                                                                                                        |
| Est2  | Telomerase              | Reverse transcriptase subunit of the telomerase holoenzyme; essential for telomerase core catalytic activity, involved in other aspects of telomerase assembly and function; mutations in human homolog are associated with aplastic anemia.                                                                                                                                                                                                                                         |
| Est3  | Telomerase              | Component of the telomerase holoenzyme; involved in telomere replication                                                                                                                                                                                                                                                                                                                                                                                                             |
| Rif1  | Rap1 interacting factor | Protein that binds to the Rap1p C-terminus; acts synergistically with Rif2p to help control telomere length and establish telomeric silencing; involved in control of DNA replication; contributes to resection of DNA double strand breaks (DSBs); deletion results in telomere elongation                                                                                                                                                                                          |
| Rif2  | Rap1 interacting factor | Protein that binds to the Rap1p C-terminus; acts synergistically with Rif1p to help control telomere length and establish telomeric silencing; deletion results in telomere elongation; RIF2 has a paralog, ORC4, that arose from the whole genome duplication                                                                                                                                                                                                                       |
| Rad9  |                         | DNA damage-dependent checkpoint protein; required for cell-cycle arrest in G1/S, intra-S, and G2/M, plays a role in postreplication repair (PRR) pathway; transmits checkpoint signal by activating Rad53p and Chk1p; hyperphosphorylated by Mec1p and Tel1p; multiple cyclin dependent kinase consensus sites and the C-terminal BRCT domain contribute to DNA damage checkpoint activation; Rad9p Chk1 Activating Domain (CAD) is phosphorylated at multiple sites by Cdc28p/Clb2p |
| Chk1  |                         | Serine/threonine kinase and DNA damage checkpoint effector; mediates cell cycle arrest via phosphorylation of Pds1p; phosphorylated by checkpoint signal transducer Mec1p; homolog of <i>S. pombe</i> and mammalian Chk1 checkpoint kinase                                                                                                                                                                                                                                           |
| Tel1  |                         | Protein kinase primarily involved in telomere length regulation; contributes to cell cycle checkpoint control in response to DNA damage; acts with Red1p and Mec1p to promote interhomolog recombination by phosphorylation of Hop1; functionally redundant with Mec1p; regulates P-body formation induced by replication stress; homolog of human ataxia-telangiectasia mutated (ATM) gene                                                                                          |
| Exo1  |                         | 5'-3' exonuclease and flap-endonuclease; involved in recombination, double-strand break repair, MMS2 error-free branch of the post replication (PRR) pathway and DNA mismatch repair; role in telomere maintenance; member of the Rad2p nuclease family, with conserved N and I nuclease domains; relative distribution to the nucleus increases upon DNA replication stress; EXO1 has a paralog, DIN7, that arose from the whole genome duplication                                 |
